# Supplementary material for: Coordinating the morphogenesis-differentiation balance by tweaking the cytokinin-gibberellin equilibrium
Source: PLOS journal article supplement (doi:10.1371/journal.pgen.1009537), 2021-04-26
Supplement: S16 (10.1371/journal.pgen.1009537.s016) [file journal.pgen.1009537.s016]

Morphogenesis and differentiation genes were identified from a published dataset (Ichihashi *et al.*, 2014). The full lists are included in Supplemental dataset 3.

1824 genes fit the condition of m+P3 exp> P4 exp> P5 exp> P6 exp and are considered "Morphogenetic" genes.

1451 genes fit the condition of m+P3 exp< P4 exp< P5 exp< P6 exp and are considered "differentiative" genes.

"Morphogenetic" genes, as a group, are significantly enriched in the upregulated group in *clausa*, *pFIL>>miR319*, and *pFIL>>TKN2*, and in the downregulated group in *La2/+* and *pFIL>>TKN2-SRDX*. They are also significantly depleted in the downregulated group in *clausa* and *pFIL>>TKN2*, and in the upregulated group in *La2/+*.

| Genotype                          | Representation factor of "morphogenetic" genes                                          |
|-----------------------------------|-----------------------------------------------------------------------------------------|
| <i>clausa</i> up                  | <b>Significantly over-represented</b><br>Representation factor: 1.5<br>$p < 0.014$      |
| <i>clausa</i> down                | <b>Significantly under-represented</b><br>Representation factor: 0.4<br>$p < 0.008$     |
| <i>La2/+</i> up                   | <b>Significantly under-represented</b><br>Representation factor: 0.6<br>$p < 0.016$     |
| <i>La2/+</i> down                 | <b>Significantly over-represented</b><br>Representation factor: 1.4<br>$p < 0.011$      |
| <i>pFIL&gt;&gt;miR319</i> up      | <b>Significantly over-represented</b><br>Representation factor: 1.3<br>$p < 0.044$      |
| <i>pFIL&gt;&gt;miR319</i> down    | <b>Not significant</b><br>Representation factor: 1.2<br>$p < 0.205$                     |
|                                   |                                                                                         |
| <i>pFIL&gt;&gt;TKN2</i> up        | <b>Significantly over-represented</b><br>Representation factor: 2.2<br>$p < 3.954e-28$  |
| <i>pFIL&gt;&gt;TKN2</i> down      | <b>Significantly under-represented</b><br>Representation factor: 0.3<br>$p < 1.710e-16$ |
| <i>pFIL&gt;&gt;TKN2-SRDX</i> up   | <b>Not significant</b><br>Representation factor: 1.1<br>$p < 0.251$                     |
| <i>pFIL&gt;&gt;TKN2-SRDX</i> down | <b>Significantly over-represented</b><br>Representation factor: 1.6<br>$p < 9.486e-06$  |

Interestingly, we see that the genes upregulated in *clausa* and *pFIL>>miR319* are different genes, supporting the notion that CLAU and LA operate in parallel pathways.

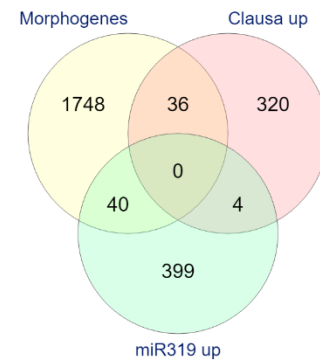

"Differentiative" genes, as a group, are significantly enriched in the upregulated group in *La2/+*, and in the downregulated group in *pFIL>>TKN2*, *clausa* and *pFIL>>miR319*. They are also significantly depleted in the downregulated group in *La2/+* and in the upregulated group in *pFIL>>miR319*, *pFIL>>TKN2*, and, interestingly, *pFIL>>TKN2-SRDX*.

| Genotype                          | Representation factor of "differentiative" genes                                 |
|-----------------------------------|----------------------------------------------------------------------------------|
| <i>clausa</i> up                  | Not significant<br>Representation factor: 1.4<br>$p < 0.057$                     |
| <i>clausa</i> down                | Significantly over-represented<br>Representation factor: 2.5<br>$p < 1.657e-06$  |
| <i>La2/+</i> up                   | Significantly over-represented<br>Representation factor: 4.0<br>$p < 2.309e-24$  |
| <i>La2/+</i> down                 | Significantly under-represented<br>Representation factor: 0.3<br>$p < 1.772e-04$ |
| <i>pFIL&gt;&gt;miR319</i> up      | Significantly under-represented<br>Representation factor: 0.7<br>$p < 0.049$     |
| <i>pFIL&gt;&gt;miR319</i> down    | Significantly over-represented<br>Representation factor: 2.6<br>$p < 2.808e-08$  |
| <i>pFIL&gt;&gt;TKN2</i> up        | Significantly under-represented<br>Representation factor: 0.4<br>$p < 1.772e-09$ |
| <i>pFIL&gt;&gt;TKN2</i> down      | Significantly over-represented<br>Representation factor: 2.7<br>$p < 9.404e-33$  |
| <i>pFIL&gt;&gt;TKN2-SRDX</i> up   | Significantly under-represented<br>Representation factor: 0.7<br>$p < 0.027$     |
| <i>pFIL&gt;&gt;TKN2-SRDX</i> down | Not significant<br>Representation factor: 1.2<br>$p < 0.150$                     |

Once again, looking at the specific differentiation genes downregulated in *clausa* and *pFIL>>miR319*, we see very little overlap.

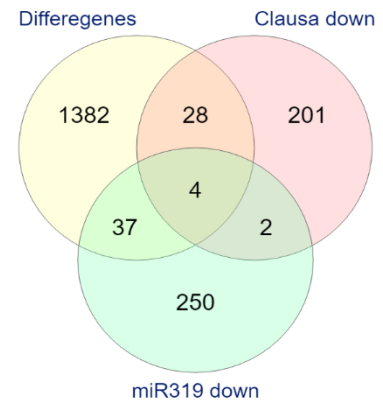

**Ichihashi Y, Aguilar-Martinez JA, Farhi M, Chitwood DH, Kumar R, Millon L V, Peng J, Maloof JN, Sinha NR. 2014.** Evolutionary developmental transcriptomics reveals a gene network module regulating interspecific diversity in plant leaf shape. *Proc Natl Acad Sci U S A* **111**: E2616-21.
